# Supplementary material for: Natural Sunlight Driven Photocatalytic Removal of Toxic Textile Dyes in Water Using B-Doped ZnO/TiO2 Nanocomposites
Source: MDPI journal article supplement (doi:10.3390/catal12030308), 2022-03-09
Supplement: s1 [file s1]

# Natural Sunlight Driven Photocatalytic Removal of Toxic Textile Dyes in Water Using B-Doped ZnO/TiO<sub>2</sub> Nanocomposites

Romana Akter Shathy <sup>1</sup>, Shahriar Atik Fahim <sup>1</sup>, Mithun Sarker <sup>1</sup>, Md. Saiful Quddus <sup>2</sup>, Mohammad Moniruzzaman <sup>3</sup>, Shah Md. Masum <sup>1, \*</sup> and Md. Ashraful Islam Molla <sup>1, \*</sup>

<sup>1</sup> Department of Applied Chemistry and Chemical Engineering, Faculty of Engineering and Technology, University of Dhaka, Dhaka 1000, Bangladesh; s-2013912615@acce.du.ac.bd (R.A.S.); s-2015216823@acce.du.ac.bd (S.A.F.); mithun@du.ac.bd (M.S.)

<sup>2</sup> Institute of Glass and Ceramic Research and Testing, Bangladesh Council of Scientific and Industrial Research, Dhaka 1205, Bangladesh; mdsaifulquddus@gmail.com

<sup>3</sup> Central Analytical and Research Facilities, Bangladesh Council of Scientific and Industrial Research, Dhaka 1205, Bangladesh; monirbcsir@gmail.com

\* Correspondence: masumacce@du.ac.bd (S.M.M.); ashraful.acce@du.ac.bd (M.A.I.M.); Tel.: +88-017-4946-7276 (S.M.M.); +88-015-5235-9706 (M.A.I.M)

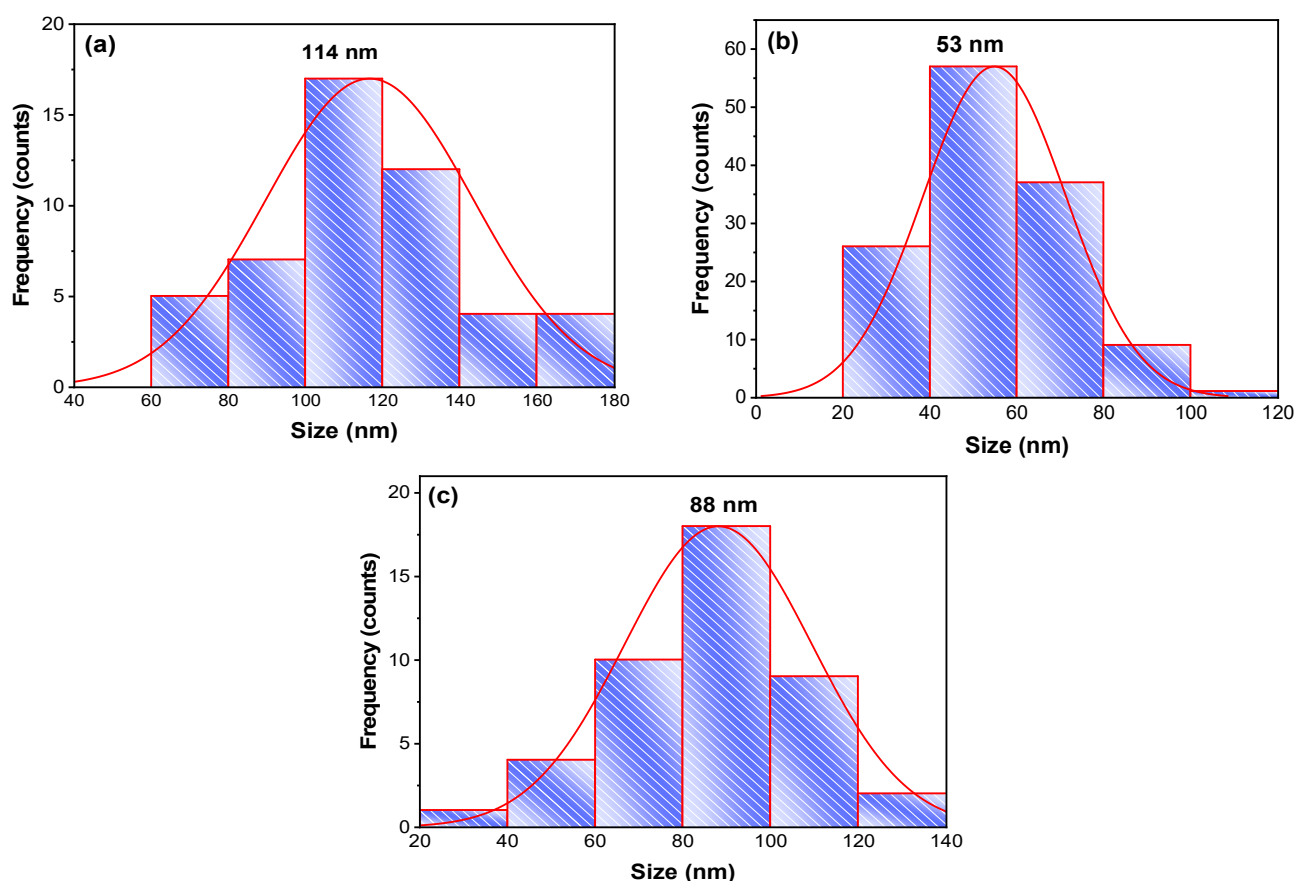

**Figure S1.** Particle size distribution histograms of (a) commercial TiO<sub>2</sub> (b) ZnO, and (c) B– ZnO/TiO<sub>2</sub>.

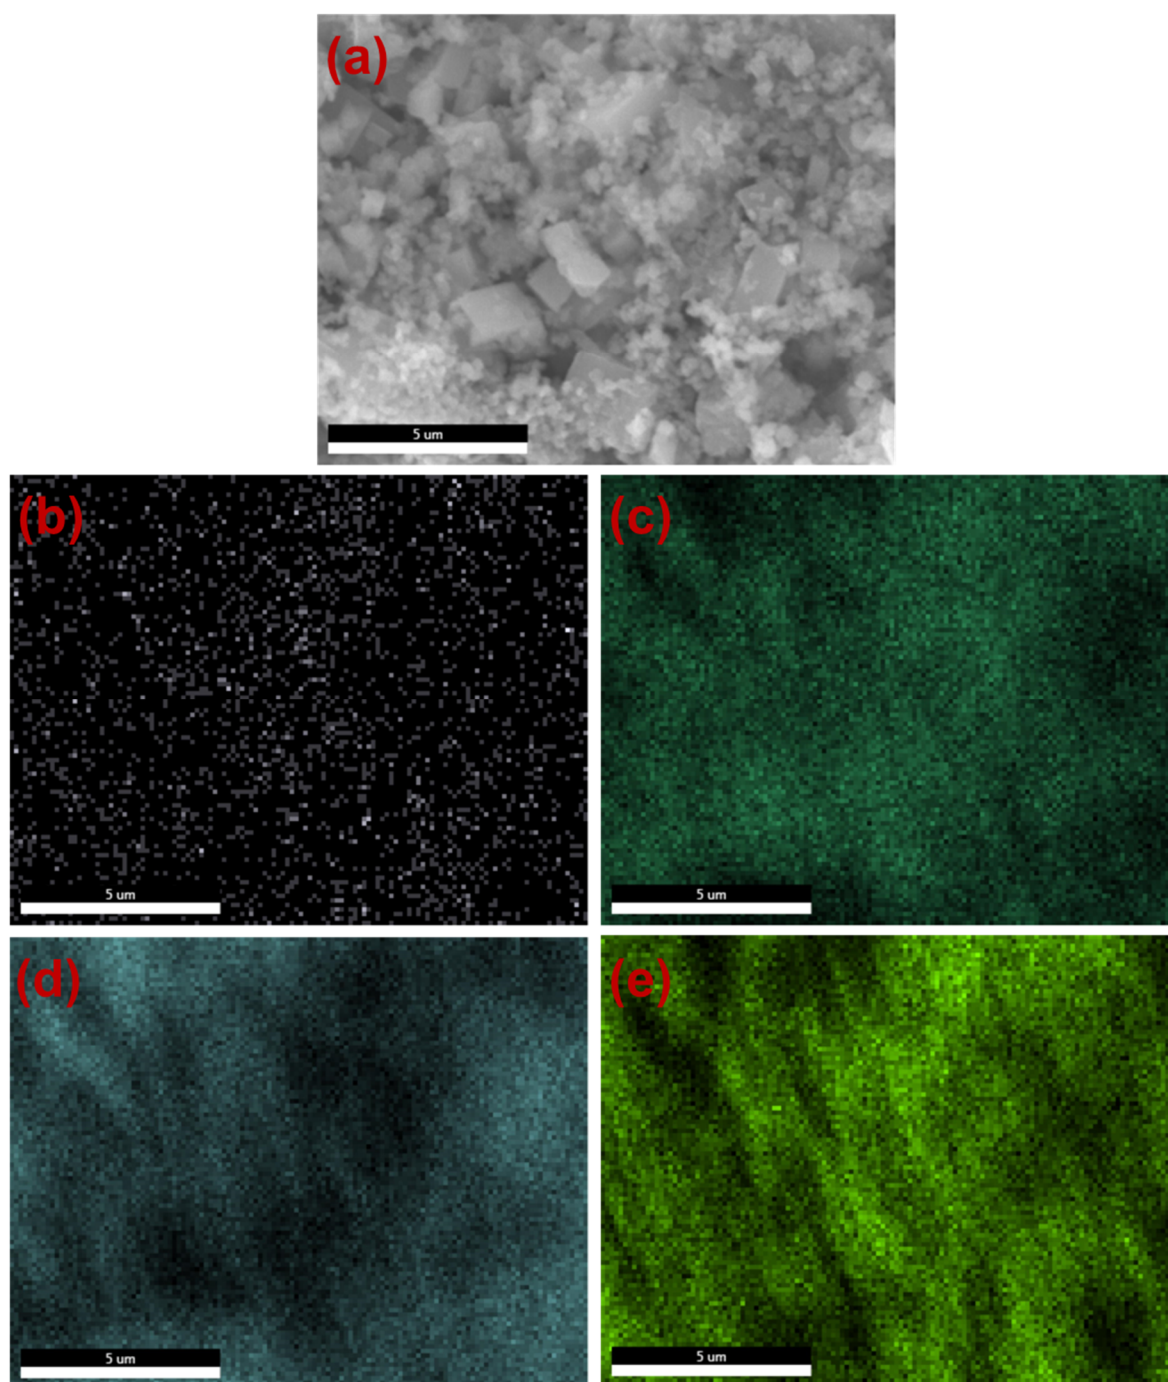

**Figure S2.** (a) SEM image of B-ZnO/TiO<sub>2</sub> and EDS elemental mapping of (b) boron (B), (c) zinc (Zn), (d) titanium (Ti), and (e) oxygen (O).

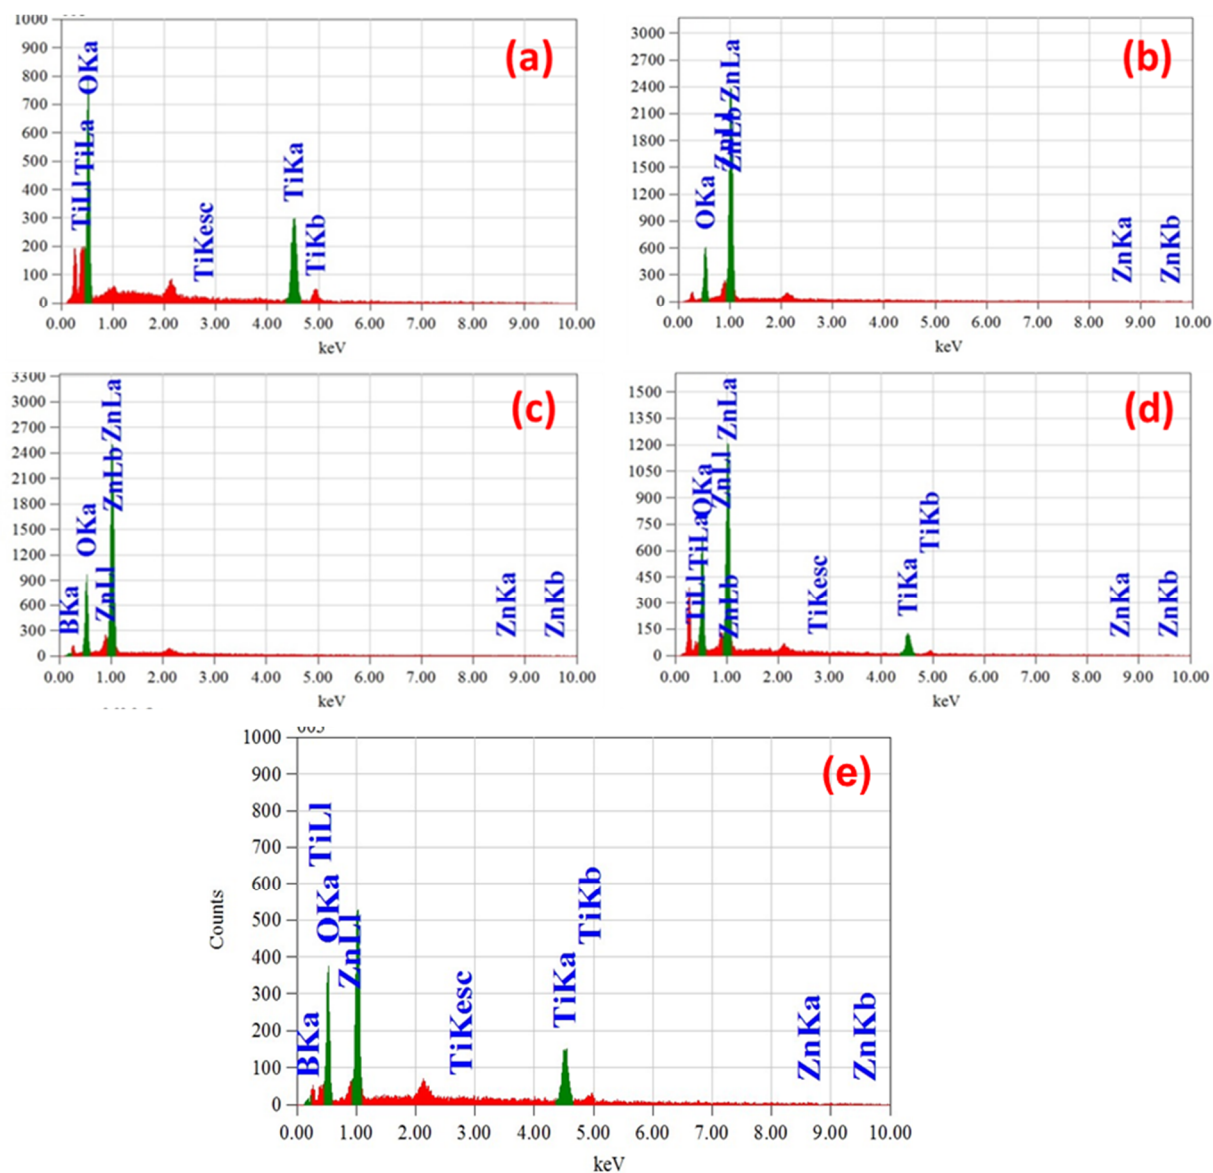

**Figure S3.** EDS pattern of (a) commercial  $\text{TiO}_2$  (b) ZnO, (c) B-ZnO, (d) ZnO/ $\text{TiO}_2$ , and (e) B-ZnO/ $\text{TiO}_2$ .

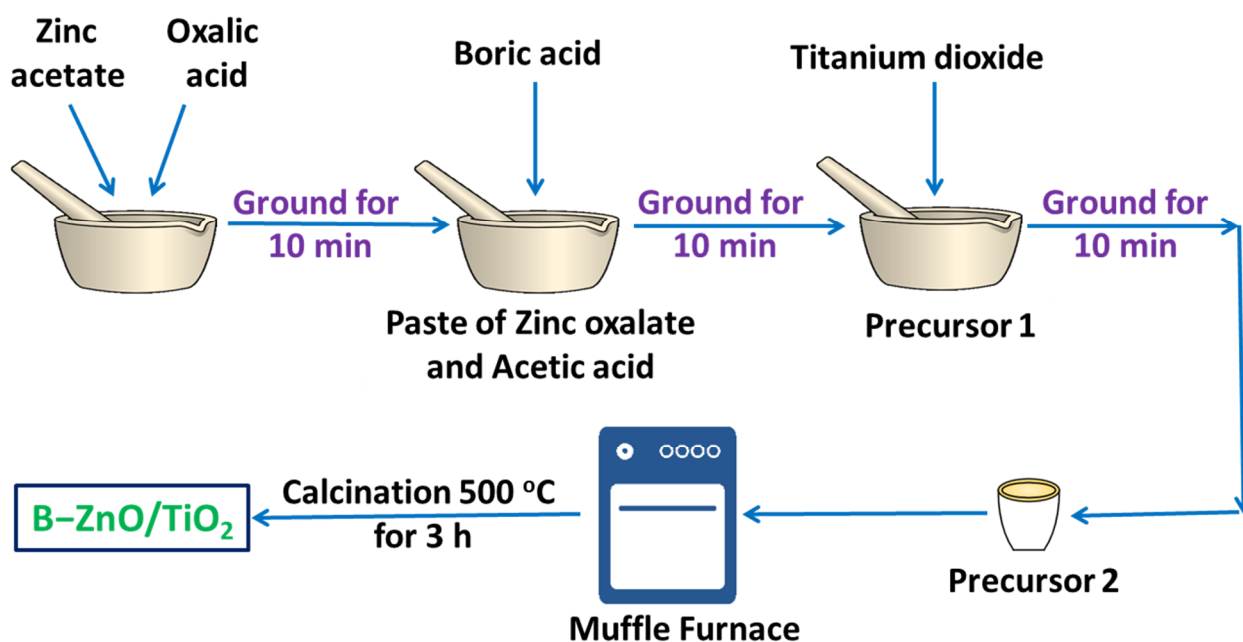

**Figure S4.** Schematic representation of the synthesis process of B-ZnO/TiO<sub>2</sub>.

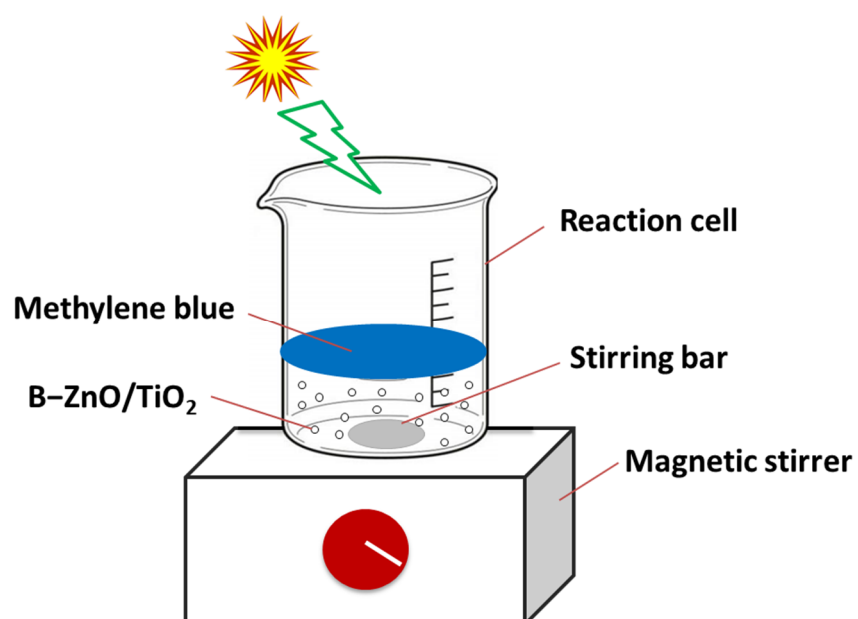

**Figure S5.** Schematic diagram of the reactor for photocatalytic degradation of MB dye.

**Table S1.** Elemental analysis of commercial TiO<sub>2</sub>, ZnO, B–ZnO, ZnO/TiO<sub>2</sub>, and B–ZnO/TiO<sub>2</sub> from EDS.

| Photocatalysts              | Element       | Mass (%) | Atom (%) |
|-----------------------------|---------------|----------|----------|
| Commercial TiO <sub>2</sub> | Titanium (Ti) | 50.07    | 25.09    |
|                             | Oxygen (O)    | 49.93    | 74.91    |
| ZnO                         | Zinc (Zn)     | 80.60    | 50.41    |
|                             | Oxygen (O)    | 19.40    | 49.59    |
| B–ZnO                       | Zinc (Zn)     | 73.23    | 40.10    |
|                             | Oxygen (O)    | 26.77    | 59.90    |
|                             | Boron (B)     | –        | –        |
| ZnO/TiO <sub>2</sub>        | Zinc (Zn)     | 49.01    | 24.22    |
|                             | Titanium (Ti) | 20.21    | 13.63    |
|                             | Oxygen (O)    | 30.78    | 62.15    |
| B–ZnO/TiO <sub>2</sub>      | Zinc (Zn)     | 31.84    | 14.33    |
|                             | Titanium (Ti) | 32.41    | 19.91    |
|                             | Oxygen (O)    | 35.75    | 65.75    |
|                             | Boron (B)     | –        | –        |

**Table S2.** Sunlight intensity during different experiments.

| Experiment type            | Date     | Intensity (μW/cm <sup>2</sup> ) |
|----------------------------|----------|---------------------------------|
| Photocatalytic degradation | 04-10-21 | ~1260                           |
|                            | 06-10-21 | ~1170                           |
|                            | 07-10-21 | ~1235                           |
| Photolysis of dye          | 10-10-21 | ~1295                           |
| Initial pH                 | 12-10-21 | ~1175                           |
|                            | 14-10-21 | ~1250                           |
| Photocatalyst amount       | 17-10-21 | ~1240                           |
| Initial dye concentration  | 20-10-21 | ~1215                           |
| Irradiation time           | 24-10-21 | ~1110                           |
| Radical scavengers         | 26-10-21 | ~1200                           |
|                            | 28-10-21 | ~1230                           |
| Reusability                | 02-11-21 | ~1210                           |
|                            | 07-11-21 | ~1125                           |
|                            | 09-11-21 | ~1180                           |
